# Supplementary material for: A new carbon-black/cellulose-sponge system with water supplied by injection for enhancing solar vapor generation
Source: Royal Society of Chemistry journal article supplement (doi:10.1039/c9ta02913c), 2019-01-01
Supplement: c9ta02913c1.pdf [file c9ta02913c1.pdf]

## **Supporting Information**

### **A new carbon-black/cellulose-sponge system with water supplied by injection for enhancing solar vapor generation**

Shang Liu, **Congliang Huang\***, Qiangqiang Huang, Fengchao Wang, Chuwen Guo

School of Electrical and Power Engineering, China University of Mining and  
Technology, Xuzhou 221116, China.

\*Corresponding Author, E-mail: [huang198564@gmail.com](mailto:huang198564@gmail.com)

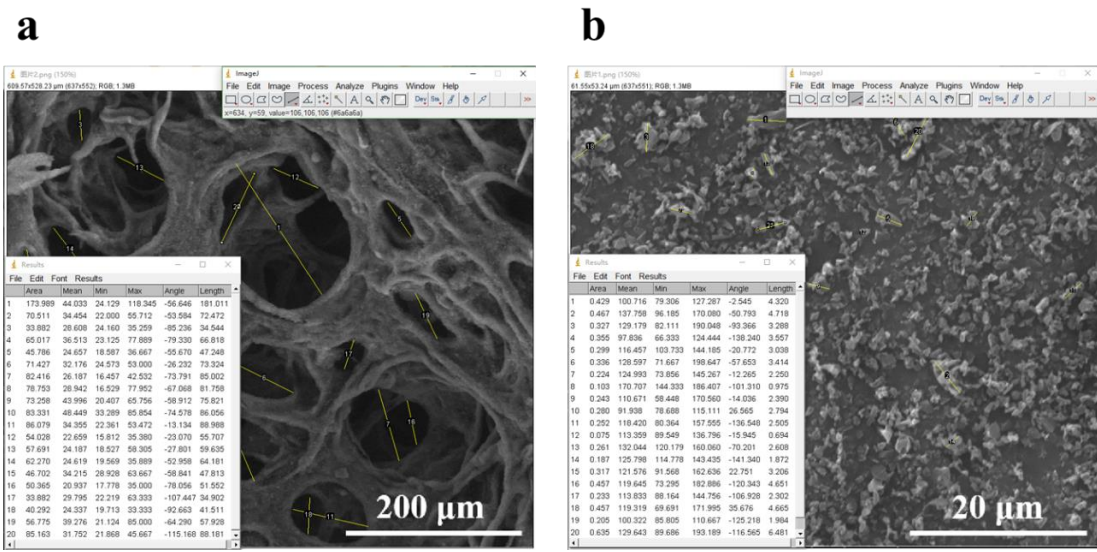

**Figure S1.** Statistical diagram of (a) pore size in cellulose sponge and (b) carbon black particle size using ImageJ.

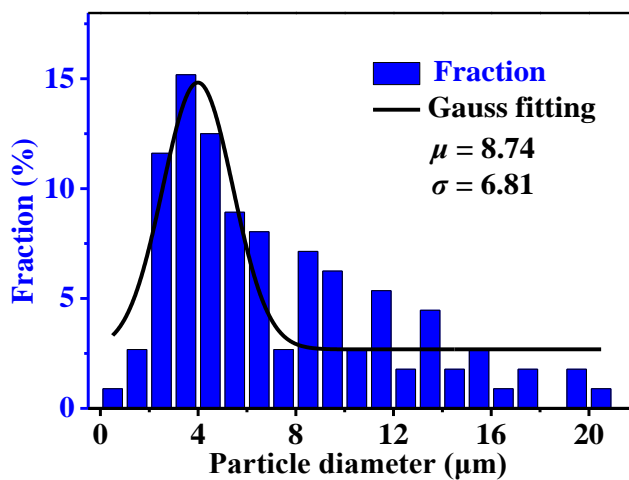

**Figure S2.** Diameter distributions of carbon black particles.

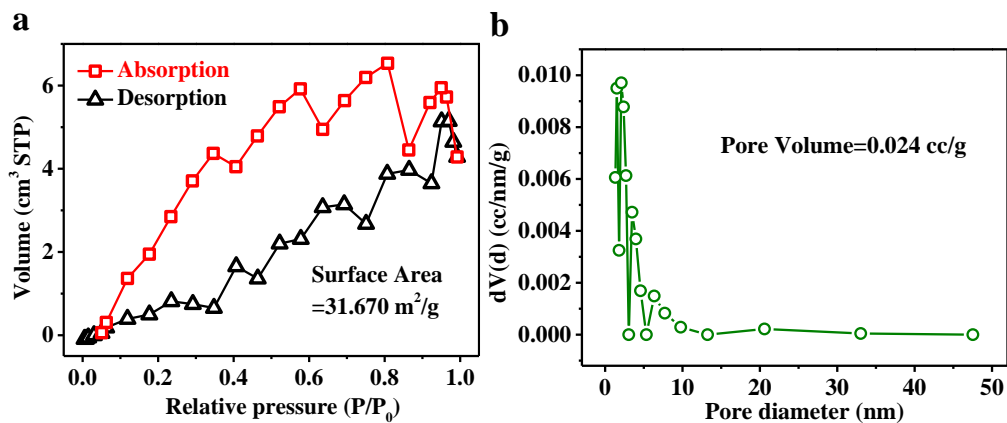

**Figure S3.** (a)  $N_2$  adsorption and desorption isotherm linear plot of CBCS and (b) the corresponding pore size distributions.

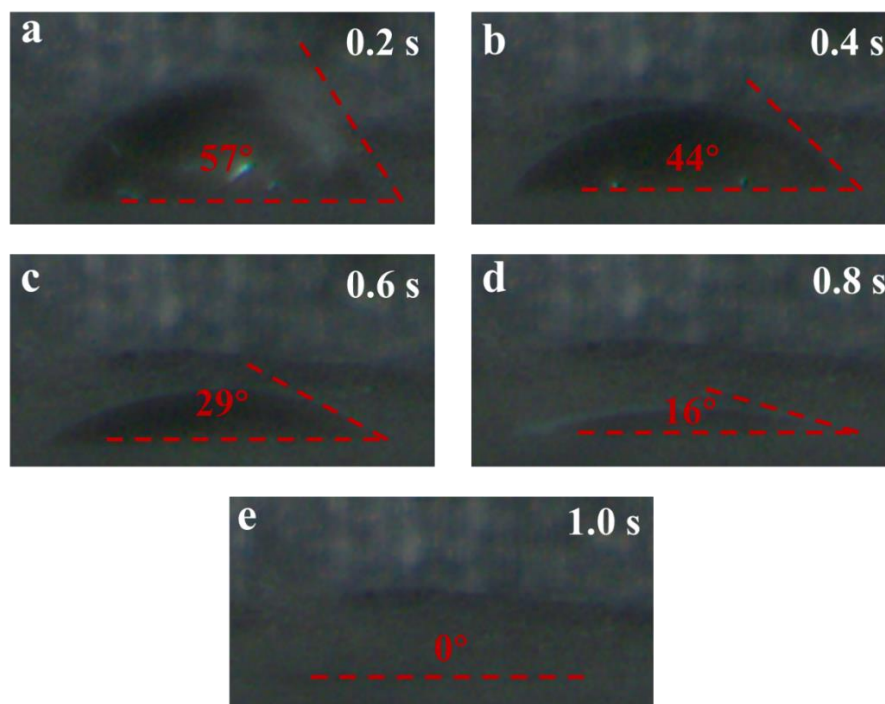

**Figure S4.** Dynamic contact angle of the CBCS.

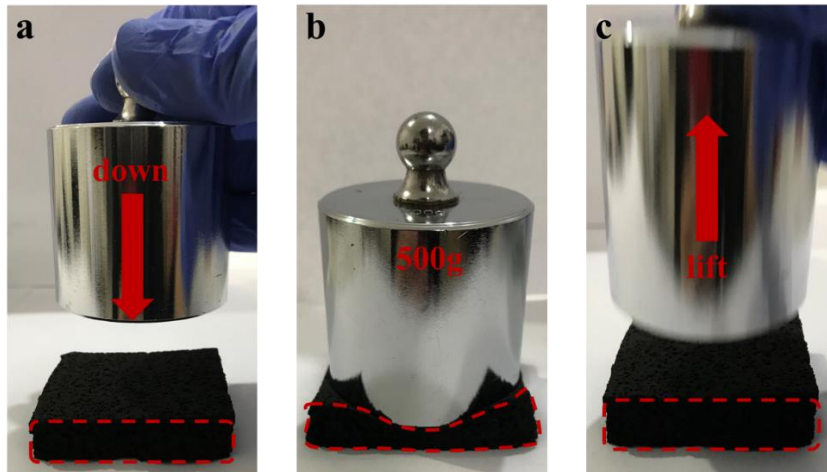

**Figure S5.** Compression tests of CBCS.

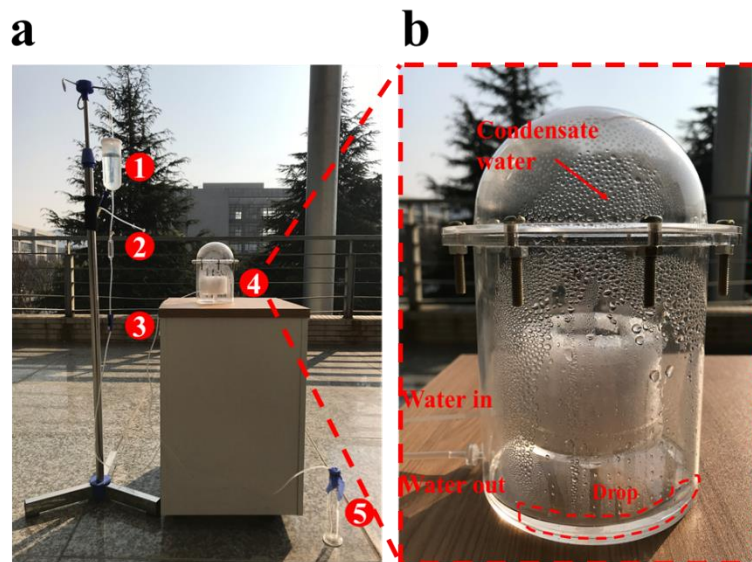

**Figure S6.** (a) Experimental system: ① seawater storage bottle, ② Murphy's dropper, ③ regulator, ④ evaporation part and ⑤ freshwater collection bottle. (b)

Zoom-in image of evaporation part.

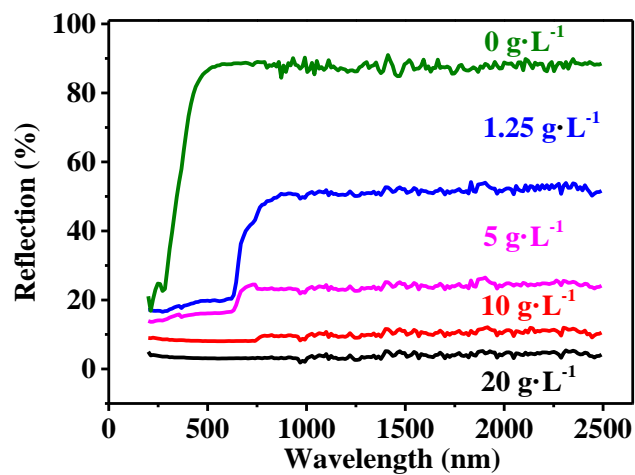

**Figure S7.** Reflection spectrum of the CBCS at wet state.

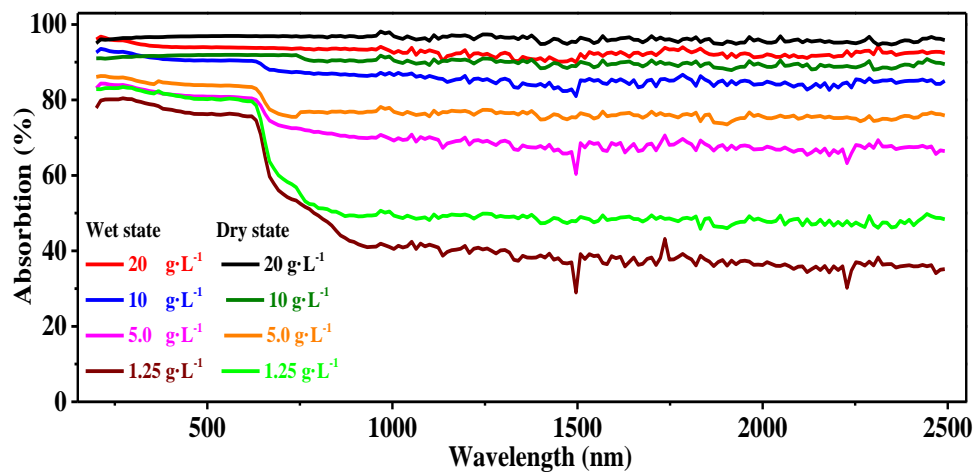

**Figure S8.** Absorption of the CBCS with different carbon black concentrations in dry and wet state.

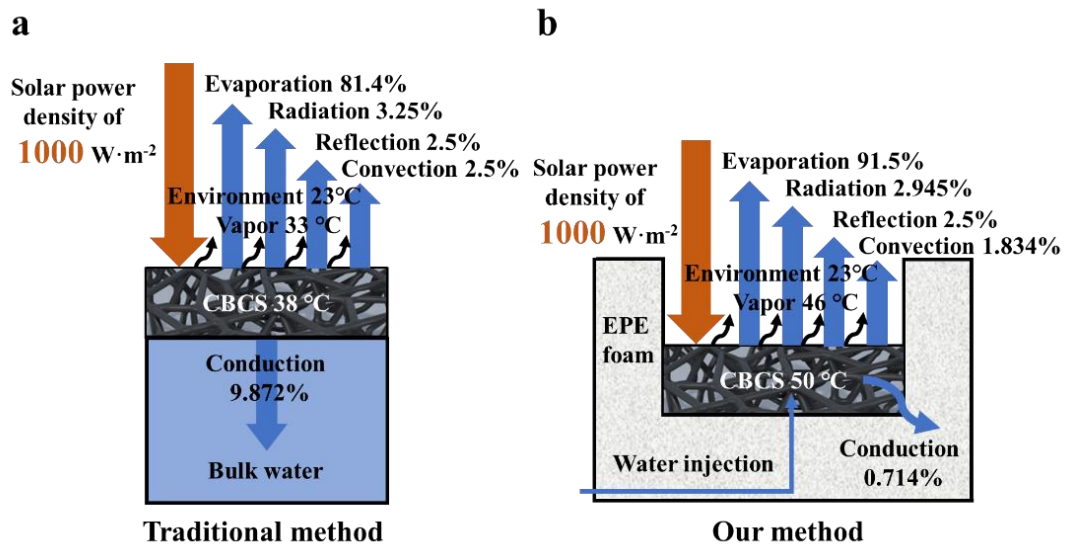

**Figure S9.** The energy analysis of traditional method (a) and CBCS system (b) under  $1000 \text{ W}\cdot\text{m}^{-2}$  irradiation density.

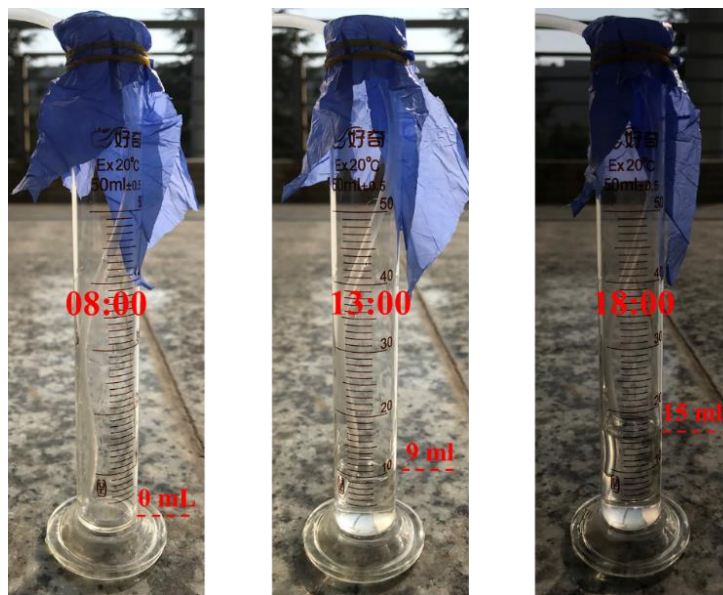

**Figure S10.** Amount of fresh water collected in graduated cylinder at different times (8:00, 13:00 and 18:00).

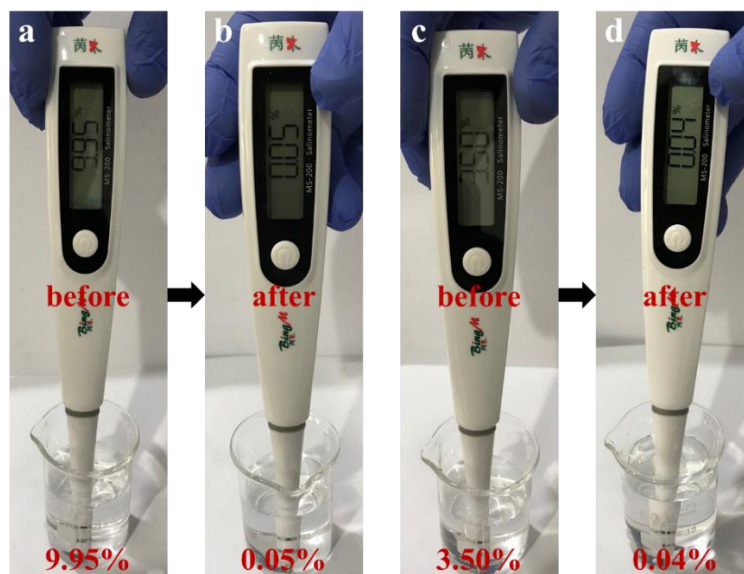

**Figure S11.** Salinity comparisons between the simulated seawater (3.5 and 10 % NaCl solution) and the fresh water.

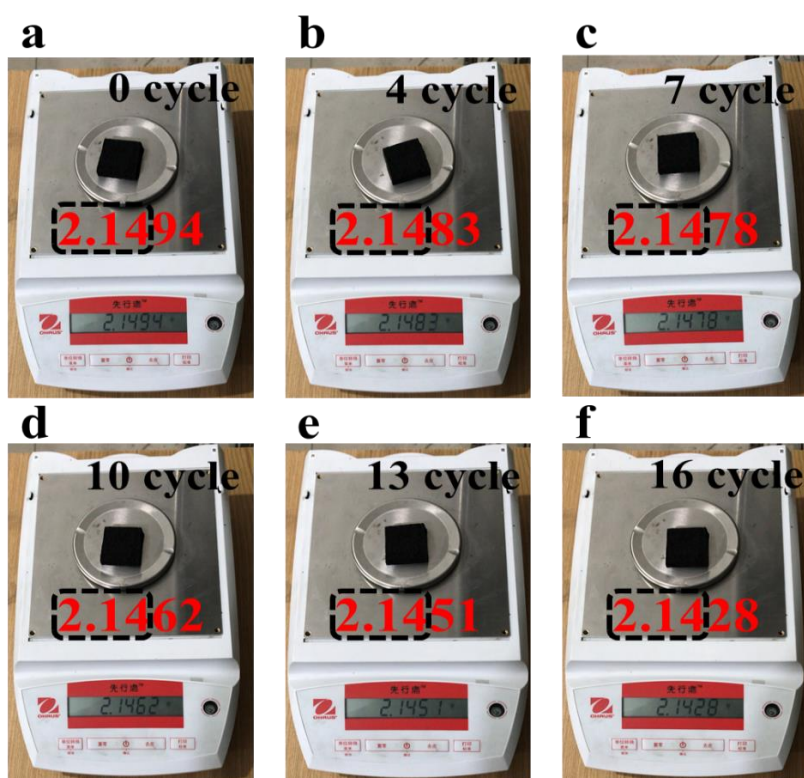

**Figure S12.** Weight of CBCS after cycles of use.

**Table S1.** Details about the experimental instruments used in this work.

| <b>Function</b>  | <b>Equipment</b>                                            | <b>Model</b>        | <b>Manufacturer</b>                                          |
|------------------|-------------------------------------------------------------|---------------------|--------------------------------------------------------------|
| Preparation      | Ultrasonic Cell Crusher                                     | JY92-IIN            | Ningbo Xinzhi Biotechnology Co., Ltd.                        |
|                  | Vacuum Drying Oven                                          | DZF-6050            | Shanghai Donglu Instrument Equipment Co., Ltd.               |
| Characterization | Thermal Conductivity Instrument                             | Model TC3000        | Xian XIATECH Technology Co., Ltd.                            |
|                  | Automatic Gas Adsorption Analyzer                           | Autosorb-LQ3        | Quantachrome Ins, U.S.A.                                     |
|                  | Universal Electronic Testing Machine                        | UTM4203X            | Shenzhen Sansizongheng Technology Co., Ltd.                  |
|                  | High-Speed Camera                                           | 1F005               | Hefei Fuhuang Junda Hi-Tech Information Technology Co., Ltd. |
|                  | Scanning Electron Microscope (SEM)                          | Quanta 250          | FEI, U.S.A.                                                  |
|                  | Fourier Transform Infrared (FTIR) Spectroscopy              | VERTEX 80v          | Bruker, Karlsruhe, Germany                                   |
|                  | X-ray photoelectron spectroscopy (XPS)                      | ESCALAB 250Xi       | Thermo Fisher, USA                                           |
|                  | Ultraviolet-Visible-Near Infrared Spectrophotometer         | UV-3600             | Shimadzu Enterprise Management (China) Co., Ltd.             |
|                  | Laser Ablation Inductively Coupled Plasma Mass Spectrometer | NWR 213-7900 ICP-MS | Agilent, China                                               |
| Process Monitor  | Solar Illumination Simulator                                | BOS-X-350G          | Changchun Ocean Photoelectric Co., Ltd.                      |
|                  | Solar Power Meter                                           | SM206               | Xinbao Keyi Co., Ltd.                                        |
|                  | Data Acquisition Instrument                                 | Keithley 2700       | Keithley Instruments Inc. Clevelan, Ohio, U.S.A.             |



|  |                         |              |                                                      |
|--|-------------------------|--------------|------------------------------------------------------|
|  | Electronic Microbalance | OHAUS CP224C | OHAUS Instruments (Changzhou) Co., Ltd.              |
|  | IR Camera               | FLUKE ti9    | Fluke electronic instruments and instruments company |

**Table S2.** Calculation of the total enthalpy of water liquid-vapor phase change at different surface temperatures.

| Solar power density ( $\text{W}\cdot\text{m}^{-2}$ ) | Sample | Concentration of carbon black particles ( $\text{g}\cdot\text{L}^{-1}$ ) | Surface temperature ( $^{\circ}\text{C}$ ) | $\Delta h_{vap}$ ( $\text{kJ}\cdot\text{kg}^{-1}$ ) | $h_{LV}$ ( $\text{kJ}\cdot\text{kg}^{-1}$ ) |
|------------------------------------------------------|--------|--------------------------------------------------------------------------|--------------------------------------------|-----------------------------------------------------|---------------------------------------------|
| 1000                                                 | CBCS   | 0                                                                        | 30                                         | 2429.7                                              | 2454.8                                      |
| 1000                                                 | CBCS   | 1.25                                                                     | 35                                         | 2417.8                                              | 2463.8                                      |
| 1000                                                 | CBCS   | 5                                                                        | 40                                         | 2405.9                                              | 2472.8                                      |
| 1000                                                 | CBCS   | 10                                                                       | 45                                         | 2393.9                                              | 2481.7                                      |
| 1000                                                 | CBCS   | 20                                                                       | 50                                         | 2381.9                                              | 2490.6                                      |
| 800                                                  | CBCS   | 20                                                                       | 41                                         | 2403.5                                              | 2470.4                                      |
| 600                                                  | CBCS   | 20                                                                       | 33                                         | 2422.6                                              | 2460.2                                      |
| 400                                                  | CBCS   | 20                                                                       | 29                                         | 2432.1                                              | 2457.2                                      |
| 200                                                  | CBCS   | 20                                                                       | 21                                         | 2450.9                                              | 2442.6                                      |

**Table S3.** Efficiency of different solar vapor generation system under different ambient temperatures.

| Materials           | Solar density ( $\text{kW}\cdot\text{m}^{-2}$ ) | Ambient temperature ( $^{\circ}\text{C}$ ) | Surface temperature ( $^{\circ}\text{C}$ ) | Evaporation rate ( $\text{kg}\cdot\text{m}^{-2}\cdot\text{h}^{-1}$ ) | Efficiency (%) | Ref. |
|---------------------|-------------------------------------------------|--------------------------------------------|--------------------------------------------|----------------------------------------------------------------------|----------------|------|
| Graphene oxide-Wood | 12                                              | 27                                         | 70                                         | 10.08                                                                | 82.8           | 24   |

|                                                    |     |      |      |       |      |    |
|----------------------------------------------------|-----|------|------|-------|------|----|
| Gold nanoparticle-airlaid paper                    | 4.5 | 27   | 80   |       | 77.8 | 22 |
| Carbon nanotube-airlaid paper                      | 5   |      |      | 3.615 | 40   | 23 |
| Surface-carbonized longitudinal wood               | 10  | 20   | 90   | 1.08  | 89   | 28 |
| Recycled waste black polyurethane sponges          | 3   | 21   | 56.3 | 2.5   | 55   | 45 |
| Carbonized mushrooms                               | 1   | 21   | 38   | 1.475 | 78   | 14 |
| Black Titania with Unique Nanocage Structure       | 1   | 30   | 80   | 1.13  | 70.9 | 36 |
| Flame-treated wood                                 | 1   | 31.5 | 43   | 1.05  | 72   | 44 |
| Commercially Available Activated Carbon Fiber Felt | 1   | 26.3 | 48   | 1.22  | 79.4 | 16 |
| GO-film-cellulose with 2D water path               | 1   | 12.9 | 38.8 | 1.45  | 80   | 27 |
| Au NPs-airlaid paper                               | 10  | 20   |      | 11.8  | 85   | 19 |
| Graphene Oxide-Polyurethane Nanocomposite Foam     | 10  |      |      | 11.24 | 81   | 18 |
| Graphite powder/semipermeable collodion membrane   | 3   | 22   | 42.4 | 1.36  | 65.8 | 26 |
| Double-layer rGO/MCE systems                       | 1   | 25   | 40.5 | 0.838 | 60   | 21 |
| CNT/silica bilayer                                 | 1   | 22   |      | 1.29  | 82   | 32 |
| F-Wood/CNTs                                        | 1   | 20   | 36.2 | 0.95  | 65   | 34 |

## Note S1

### Reflectivity calculation

As described by the Fresnel equation, the reflectivity between different mediums can be calculated by,

$$R = \left( \frac{n_a - n_b}{n_a + n_b} \right)^2$$

where  $n_a$  and  $n_b$  represent the refractive index of medium-a and medium-b, respectively.

When there is only air-carbon black interface under dry condition,

$$R_{dry} = \left( \frac{1.00 - 1.60}{1.00 + 1.60} \right)^2 = 5.33 \%$$

The value of the reflectivity is calculated to be 5.33 %.

While there are both air-water and water-carbon black interfaces under wet condition,

$$R_{wet_1} = \left( \frac{1.00 - 1.33}{1.00 + 1.33} \right)^2 = 2 \%$$
$$R_{wet_2} = \left( \frac{1.33 - 1.60}{1.33 + 1.60} \right)^2 = 0.85 \%$$
$$R_{wet} \approx R_{wet_1} + R_{wet_2} = 2.85 \%$$

Thus, the corresponding reflectivity is reduced to about 2.85 %. In the calculation, the contribution of water to the improvement of light absorption efficiency is excluded when water is transparent in visible spectra. Also, the calculation is based on the hypothesis that the incident light is normal to the interface and could not be affected by the reflected light.

## **Note S2**

### **Influence of cross-sectional area and height on water injection rate**

More experiments have already been carried out to reveal effects of the system volume on the evaporation performance. The volume of CBCS system is equal to cross-sectional area multiplied by height, so we explore effects of cross-sectional area and

height on the optimum water injection rate. The ability of water molecules to diffuse horizontally in CBCS is limited by surface tension. When cross-sectional area is enlarged, one water injection point cannot wet the whole cross-sectional area in time, which has a negative impact on evaporation performance. In our system, one water injection point can only quickly wet an area of about 50 cm<sup>2</sup> in 120 seconds, thus multiple water injection points should be applied to eliminate the limitation of water-horizontal-diffusion ability on evaporation performance. When the height is fixed to 0.4 cm, the mass changes of CBCS with different cross-sectional areas were exhibited in Figure S13a and the calculated results of optimum water injection rate were shown in Figure S13c. It illustrated that the optimum water injection rate increases almost linearly with the increase of cross-sectional area.

Considering the situation that the water is injected from the bottom of CBCS system, the maximum wettable height (about 7 cm) of water in cellulose sponge is controlled by both capillary force and gravity, as exhibited in Figure S12. As the height of CBCS increases, more energy will be transferred to the bottom, thus results in a reduction of evaporation performance, which suggests a decrease of optimum injection rate. Therefore, the optimum injection rate decreases with the increase of height, as shown in Figure S13c which was calculated from the mass changes of water in Figure S13a. In this work, a low height could supply a large wettability of cellulose sponge, but a too low height will cause a direct pass of incident light through CBCS, thus lead to a decrease of light absorption. Therefore, a proper height should be applied. In this work, a height of 0.4 cm was applied for improving evaporation performance.

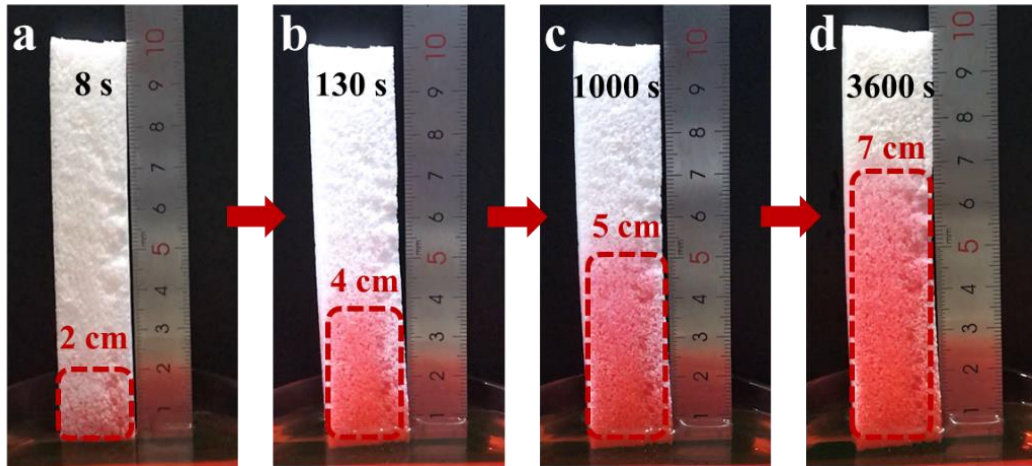

**Figure S12.** Wettable height of water in cellulose sponge with different contacting time.

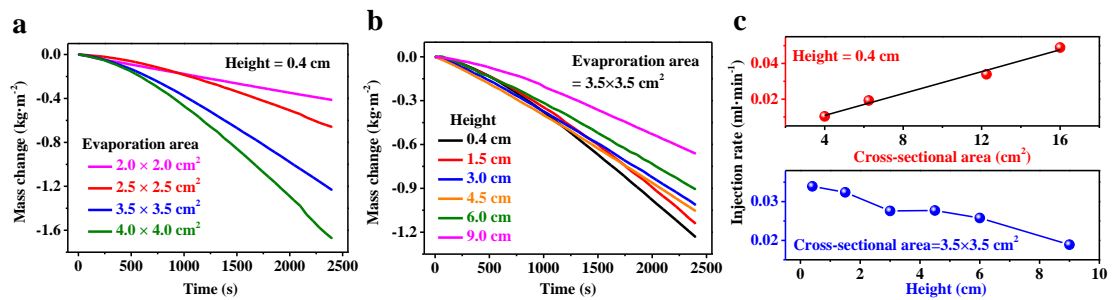

**Figure S13.** Mass change of CBCS with (a) different heights and (b) different evaporation areas; (c) optimum water injection rate of CBCS with different heights and evaporation areas.

## Note S3

### Energy loss analysis

The energy losses in CBCS with the concentration of carbon black particles of  $20 \text{ g}\cdot\text{L}^{-1}$  under one sun irradiation is calculated as an example. The energy consumption in the CBCS system can be divided into five main parts: (1) energy consumption by water

evaporation, (2) by the reflected solar light on surface, (3) by the conductive heat loss into EPE foam, (4) by the convective heat losses on the surface (5) by the radiative heat losses on the surface.

### **(1) Energy consumption by water evaporation.**

Energy consumption through water evaporation equals to the evaporation efficiency, i. e. 91.5 % ( $\eta_{eva} = 91.5 \%$ ).

### **(2) Energy consumption by the reflected solar light on surface.**

Considering the optical absorption of CBCS is about 97.5 %, the reflect heat loss should be about 2.5 % ( $\eta_{ref} = 2.5 \%$ ).

### **(3) Energy consumption by the conductive heat loss into EPE foam.**

The heat conduction loss to bulk water can be calculated by the Fourier's law (i.e.  $P_{cond} = k \cdot \frac{\Delta T}{L}$ ).  $k$  is the thermal conductivity of bulk water, and  $\Delta T/L$  refers to the temperature gradient in the bulk water. However, the heat conduction loss to bulk water in present work is completely eliminated attributing to special water supply design. In this work, the heat conduction from CBCS to EPE foam can be simplified to one-dimensional steady state heat conduction, which can be calculated by  $P_{cond_{EPE}} = \frac{k_{EPE}}{\delta} \Delta T$ , where  $k_{EPE}$  is the thermal conductivity,  $\delta$  is the thickness and  $\Delta T$  is the temperature difference between inside and outside walls of the EPE foam. Thus,

$$P_{cond_{EPE}} = \frac{0.025}{0.0175} \times 5 \approx 7.14 \text{ W}\cdot\text{m}^{-2}, \quad \eta_{cond_{EPE}} = 0.714 \%$$

#### **(4) Energy consumption by the convective heat losses on the surface.**

The convection loss per unit area can be estimated by the Newton's law,

$$P_{conv} = h_c(T_2 - T_1)$$

where  $h_c$  stands the convective heat transfer coefficient, which can be calculated to be about  $4.59 \text{ W}\cdot\text{m}^{-2}\cdot\text{K}^{-1}$  in this condition (more detailed calculation process can be referred to **Note S4** in Supporting information). It is noteworthy that the  $T_1$  here refers to the average temperature of the air inside the concave groove ( $\approx 46 \text{ }^\circ\text{C}$ ) because of the special design of thermal-insulation concave groove.  $T_2$  is the average temperature of absorber surface (about  $50^\circ\text{C}$ ) under the steady state condition. Although  $T_1$  and  $T_2$  are affected by ambient temperature, the temperature difference between  $T_1$  and  $T_2$  is small due to the characteristics of thermal localization of CBCS system. Convection loss is calculated to be  $P_{conv} = 4.585564 \times (50 - 46) \approx 18.34 \text{ W}\cdot\text{m}^{-2}$ ,  $\eta_{conv} = 1.834 \%$ .

#### **(5) Energy consumption by the radiative heat losses on the surface.**

The radiation loss per unit area can be calculated using the Stefan-Boltzmann law,

$$P_{rad} = \varepsilon\sigma(T_2^4 - T_1^4)$$

where  $\varepsilon$  is the emissivity of the CBCS sample assumed to be about 0.98 in this work,  $\sigma$  denotes the Stefan-Boltzmann constant, which is  $5.67 \times 10^{-8} \text{ W}\cdot\text{m}^{-2}\cdot\text{K}^{-4}$ . Thus,  $P_{rad} = 0.98 \times 5.67 \times 10^{-8} \times (323.15^4 - 319.15^4) = 29.45 \text{ W}\cdot\text{m}^{-2}$ ,  $\eta_{conv} = 2.945 \%$ .

In summary, the total energy consumption of the five main parts is about 99.5 % (i.e.  $91.5 \% + 2.5 \% + 0.714 \% + 1.834 \% + 2.945 \% \approx 99.5 \%$ ), which follows the law of conservation of energy.

## Note S4

### Calculation of convective heat transfer coefficient ( $h_c$ ):

In a natural convection problem, a dimensionless number, Rayleigh number ( $R_a$ ), is critical in determination of  $h_c$ . Rayleigh number can be expressed as:

$$R_a = GrPr = \frac{g\beta(T_1 - T_2)l^3}{\nu^2} Pr$$

where Grashof number ( $Gr = \frac{g\beta(T_1 - T_2)l^3}{\nu^2}$ ) is a dimensionless number in heat transfer and hydrodynamics, which approximates the ratio of buoyancy to viscous force acting on a fluid. Prandtl number ( $Pr$ ) is also a dimensionless number indicated the relationship between temperature boundary layer and flow boundary layer, which is defined as the ratio of momentum diffusivity to thermal diffusivity.  $g$  is the gravitational constant.  $\beta$  is coefficient of volume expansion, i.e.  $1/T$  ( $K^{-1}$ ).  $l$  is the characteristic length of the geometry (m).  $\nu$  is the kinematics viscosity of the fluid ( $m^2/s$ ). The sample in the experiment is a square with a side length of 3.5 cm.

The qualitative temperature  $T_m = (T_1 + T_2)/2 = 321$  K,

The relevant physical properties of air can be obtained at this temperature,

$$B = 1/T_m = 3.12 \times 10^{-3} K^{-1},$$

$$\nu = 1.78 \times 10^{-5} m^2 \cdot s^{-1} \text{ at } 48 \text{ }^\circ\text{C},$$

$$g = 9.8 m \cdot s^{-2},$$

$$l = 3.5 \times 10^{-2} m,$$

$$Pr = 0.698 \text{ at } 48 \text{ }^\circ\text{C},$$

Thus,  $R_a = 8708$ ,  $Gr = 1.25 \times 10^4$ ,



$$Nu = 0.59 \times R_a^{0.25} = 5.7,$$

$$h_c = \frac{Nu \cdot k}{l} = 4.59 \text{ W} \cdot \text{m}^{-2} \cdot \text{K}^{-1}$$

It is worth noting that the humidity only has a negligible effect on kinematic viscosity and  $Pr$ . Also, the thermal conductivity of air at low temperature varies little with humidity.
